# Supplementary material
Source: Springer Nature journal article supplement (https://www.springermedizin.de/resource/supplementary/12889_2012_5280_MOESM1_ESM.pdf/9495052)
Supplement: MOESM1 [file 9495052]

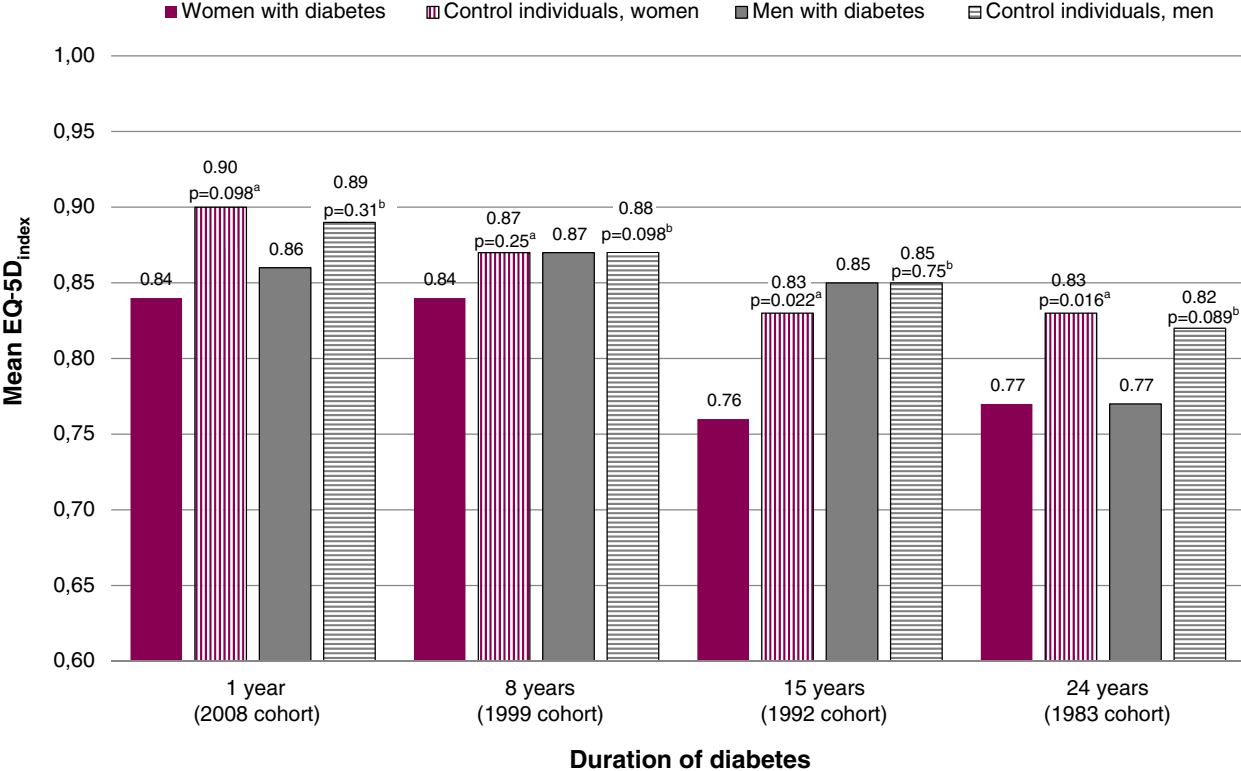

<sup>a</sup>p-value for comparison between women with diabetes and their corresponding control individuals.

<sup>b</sup>p-value for comparison between men with diabetes and their corresponding control individuals.
